# Supplementary material for: Interactions between Siglec-7/9 receptors and ligands influence NK cell–dependent tumor immunosurveillance
Source: JCI journal article supplement (doi:10.1172/jci65899), 2014-02-24
Supplement: sd1 [file 1]

966 **SUPPLEMENTAL FIGURE LEGENDS**

967 **Supplemental Figure 1** Siglec-7 and -9 ligand expression on tumor cell lines and  
968 primary tumors assessed by flow cytometry **(A,B)** or confocal microscopy **(C,D)**. **(A)**  
969 Histograms depict differential staining for ligands of Siglec-3, -7 and -9 on melanoma  
970 line A375, head and neck squamous cell carcinoma (HNSCC) cell line LAU2106, and  
971 colon adenocarcinoma line HCT116. Grey-shaded histograms represent control  
972 staining with secondary antibody. **(B)** Geometric mean fluorescence intensity (GMFI)  
973 ratios of Siglec-7 (open symbols) and Siglec-9 (filled symbols) ligand expression on  
974 CLL (n=3) and AML (n=3) leukemia cells. **(C,D)** Paraffin-embedded tissue biopsy  
975 sections of malignant melanoma lesions in dermal skin layers **(C)** or healthy dermal  
976 skin **(D)**, co-stained for the melanoma marker Melan-A and Siglec-7 or Siglec-9  
977 ligands, respectively. Scale bar, 50  $\mu\text{m}$  **(C,D)**. Data are representative of at least  
978 three **(A)** independent experiments, and of six individual subjects **(C,D)**.

979

980 **Supplemental Figure 2.** Neuraminidase treatment has no effect on 721.221 cells.  
981 Cytotoxicity of isolated peripheral blood NK cells from healthy donors (n=5) against  
982 721.221 as assessed in a  $^{51}\text{Cr}$ -release assay, without (open circles) or with  
983 neuraminidase-treatment (filled circles) of target cells. Cytotoxicity was evaluated at  
984 the indicated effector to target (E/T) ratios.

985

986 **Supplemental Figure 3.** Flow cytometric intracellular cytokine measurement in NK  
987 cells exposed to neuraminidase treated or untreated K562 cells (10/1 E/T ratio, n=7).  
988 \*P<0.05 and \*\*P<0.005 (Student's *t*-test).

989 **Supplemental Figure 4.** Circulating NK cells of (hu)-NSG mice express high levels  
990 of Siglec-7. Flow cytometry of NK cells from peripheral blood of hu-NSG mice (n=13)  
991 for expression of human Siglec-7 and Siglec-9. Frequency (left of each pair) and  
992 representative histograms (right of each pair) are shown. Specific staining (black  
993 line), and isotype-matched control (shaded).

994

995 **Supplemental Figure 5.** Siglec-7 and Siglec-9 ligands on K562 cells are not  
996 reexpressed within 24 hours following neuraminidase treatment. Expression of  
997 Siglec-7 and Siglec-9 ligands on K562 cells before (t=0) or after neuraminidase-  
998 treatment, as assessed by flow cytometry over a period of 24 hours. Values are  
999 expressed as GMFI ratio compared to control.

1000

1001 **Supplemental Figure 6.** The combination of Siglec-7 and -9 Fab fragments has no  
1002 enhanced effect on NK cell cytotoxicity against K562 target cells, as assessed by a  
1003 <sup>51</sup>Cr assay at an E/T ratio of 10/1 (n=7). \*\*P<0.005 (Student's *t*-test).

1004

1005 **Supplemental Figure 7.** Effects of targeting Siglec-7 and -9 on NK cell cytotoxicity,  
1006 survival and proliferation. (A,B) Cytotoxicity of isolated peripheral blood NK cells from  
1007 healthy donors against the K562 cell line assessed in a <sup>51</sup>Cr-release assay in the  
1008 presence of indicated mAbs (n=2 for Clone 191240, n=10 for Clone E10-286). E/T  
1009 ratio 20/1. (B) Cytotoxicity of sorted human CD56<sup>dim</sup> CD16<sup>+</sup> Siglec-9<sup>-</sup> NK cells against  
1010 the K562 cell line assessed in a <sup>51</sup>Cr-release assay in the presence of E10-286 mAb  
1011 or an isotype control (n=3). (C,D) Flow cytometric analysis of NK cell survival (C) and

1012 proliferation (D). (C) AnnexinV-GFP/PI staining of 24-hour cultures in the presence of  
1013 indicated mAbs at 10  $\mu\text{g/ml}$ . Similar results were achieved at lower mAb  
1014 concentrations. (D) CFSE dilution upon stimulation with IL-2 and IL-15 for 9 days and  
1015 culture in the presence of anti-Siglec-7 mAb at 4  $\mu\text{g/ml}$ , anti-Siglec-9 mAb at 3  $\mu\text{g/ml}$ ,  
1016 or isotype-matched control mAbs. Data are representative of four (C) or three (D)  
1017 independent experiments.

1018

1019 **Supplemental Figure 8.** Expression of siglecs on human NK cells. (A) Flow  
1020 cytometry of surface siglec receptor expression on peripheral blood NK cells of adult  
1021 healthy donors with and without neuraminidase treatment. Specific staining (black  
1022 line), neuraminidase treated cells (dashed line) and isotype-matched control  
1023 (shaded) (n=3). (B) Representative examples of Siglec-7 and Siglec-9 expression on  
1024  $\text{CD56}^{\text{bright}} \text{CD16}^{\text{dim/-}}$  and  $\text{CD56}^{\text{dim}} \text{CD16}^{\text{+}}$  NK cell subsets with or without unmasking  
1025 by neuraminidase treatment (removal of sialic acid residues). **(C,D) Siglec-9**  
1026 **expression on NK cells in presence of NK cell-relevant cytokines as assessed by flow**  
1027 **cytometry. C) Geometric mean fluorescence intensity (GMFI) ratios of gated Siglec-**  
1028 **9<sup>+</sup> NK cells from total NK cell cultures. D) Histograms are representative of freshly**  
1029 **fluorescence-activated cell sorted NK cell Siglec-9<sup>+</sup> or Siglec-9<sup>-</sup>  $\text{CD56}^{\text{dim}}$  NK cell**  
1030 **subsets (dotted line), isotype control (shaded), 24 (dashed line), 48 (solid line) or 120**  
1031 **(long dashed line) hour-cultures. Data are representative of at least three (A,D), six**  
1032 **(C), or 14 (B), experiments.**

1033

1034 **Supplemental Figure 9. (A,B)** Flow cytometry of Siglec-9<sup>-</sup> (open circles) and Siglec-  
1035 9<sup>+</sup> (filled circles) gated CD56<sup>dim</sup> CD16<sup>+</sup> NK cells from healthy donors (n=10-19) for  
1036 surface expression of NKG2D and NCRs.

1037

1038 **Supplemental Figure 10.** Frequency and Siglec-7 expression on peripheral blood  
1039 NK cells in cancer. **(A)** NK cell numbers in the peripheral blood of melanoma and  
1040 colon adenocarcinoma (CoACa) patients. **(B)** Cytotoxicity of NK cells from healthy  
1041 donors (HD) and melanoma patients, as assessed in a <sup>51</sup>Cr release assay of K562  
1042 target cells at an E/T ratio of 20/1 (n=7). **(C)** Expression of Siglec-7 on peripheral  
1043 blood NK cells of healthy donors (HDs) and cancer patients. Shown are frequency  
1044 and GMFI ratio of specific staining to isotype-matched control, without (white bars) or  
1045 with (grey bars) neuraminidase treatment. \*P<0.05, and \*\*P<0.005 (Student's t-test).

**A**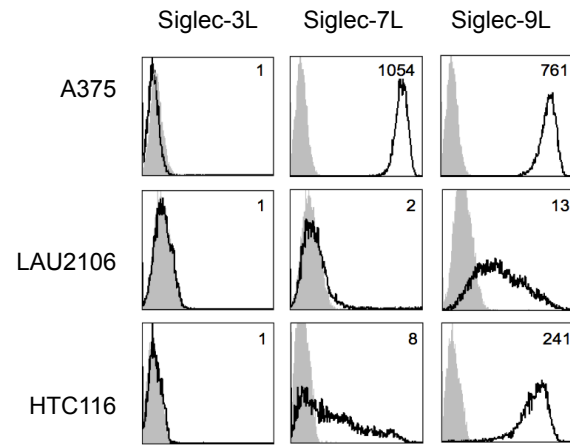**B**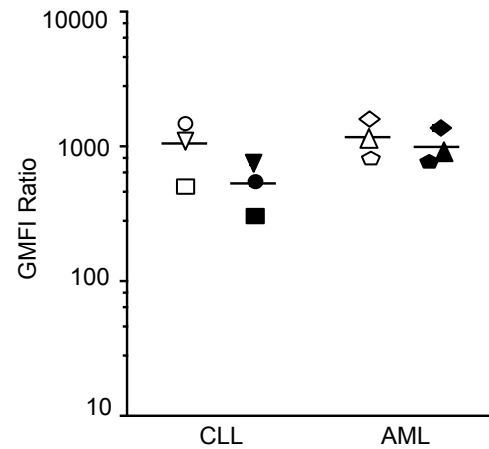**C**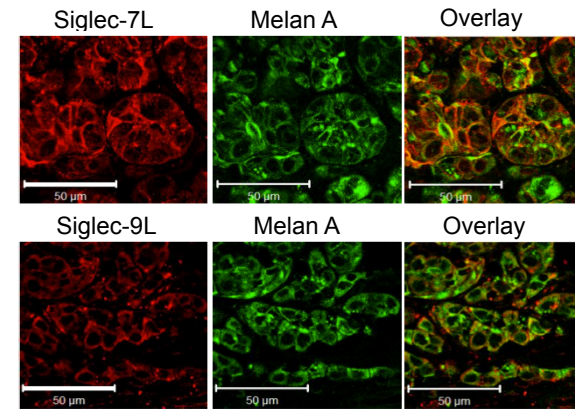**D**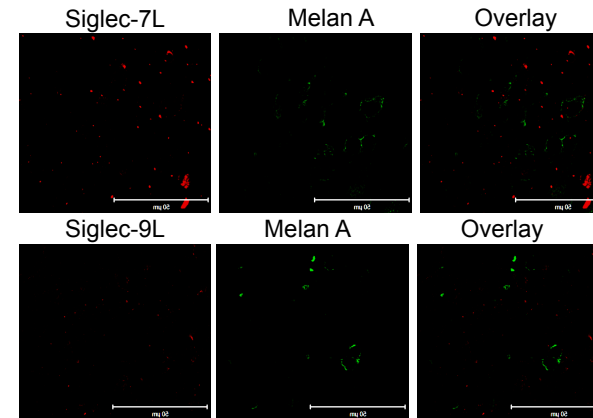

**Supplemental Figure 1** Siglec-7 and -9 ligand expression on tumor cell lines and primary tumors assessed by flow cytometry (A,B) or confocal microscopy (C,D). (A) Histograms depict differential staining for ligands of Siglec-3, -7 and -9 on melanoma line A375, head and neck squamous cell carcinoma (HNSCC) cell line LAU2106, and colon adenocarcinoma line HCT116. Grey-shaded histograms represent control staining with secondary antibody. (B) Geometric mean fluorescence intensity (GMFI) ratios of Siglec-7 (open symbols) and Siglec-9 (filled symbols) ligand expression on CLL (n=3) and AML (n=3) leukemia cells. (C,D) Paraffin-embedded tissue biopsy sections of malignant melanoma lesions in dermal skin layers (C) or healthy dermal skin (D), co-stained for the melanoma marker Melan-A and Siglec-7 or Siglec-9 ligands, respectively. Scale bar, 50 μm (C,D). Data are representative of at least three (A) independent experiments, and of six individual subjects (C,D).

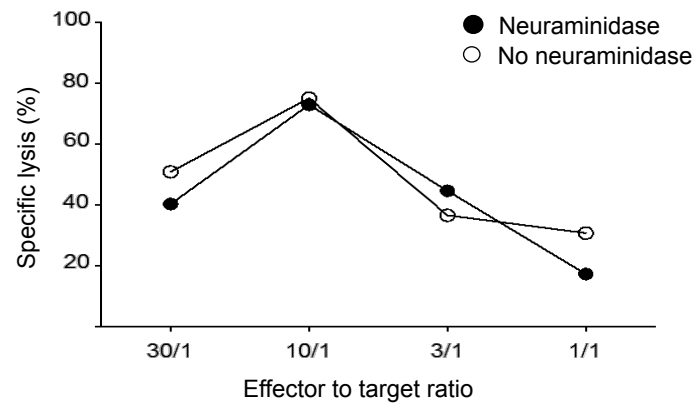

**Supplemental Figure 2.** Neuraminidase treatment has no effect on 721.221 cells. Cytotoxicity of isolated peripheral blood NK cells from healthy donors (n=5) against 721.221 as assessed in a  $^{51}\text{Cr}$ -release assay, without (open circles) or with neuraminidase-treatment (filled circles) of target cells. Cytotoxicity was evaluated at the indicated effector to target (E/T) ratios.

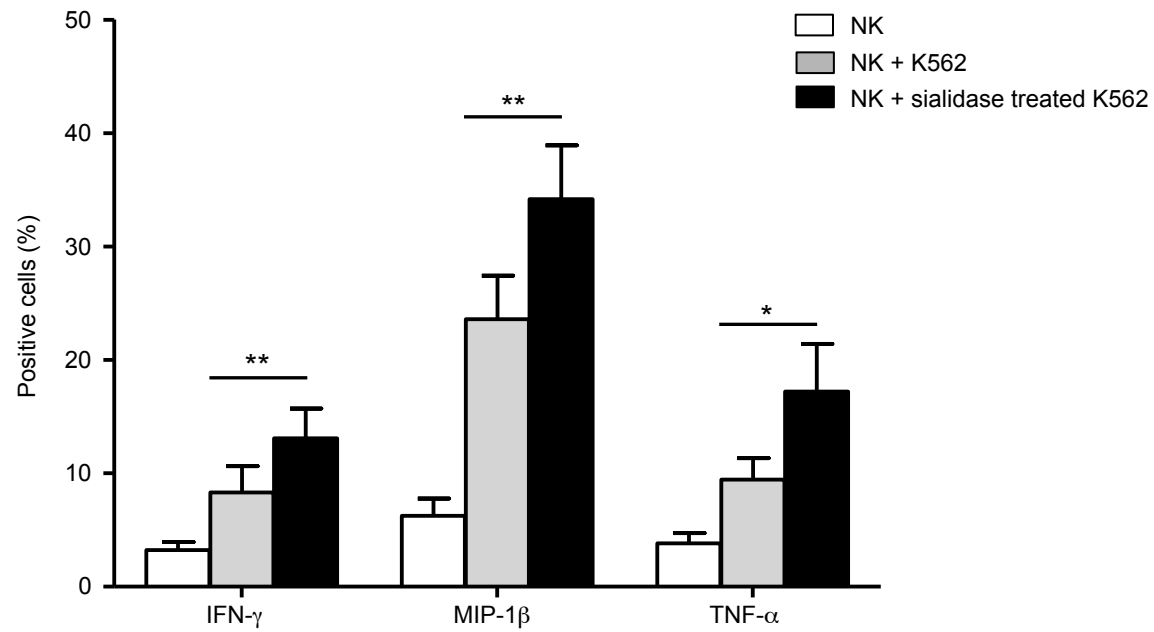

**Supplemental Figure 3.** Flow cytometric intracellular cytokine measurement in NK cells exposed to neuraminidase treated or untreated K562 cells (10/1 E/T ratio, n=7). \*P<0.05 and \*\*P<0.005 (Student's *t*-test).

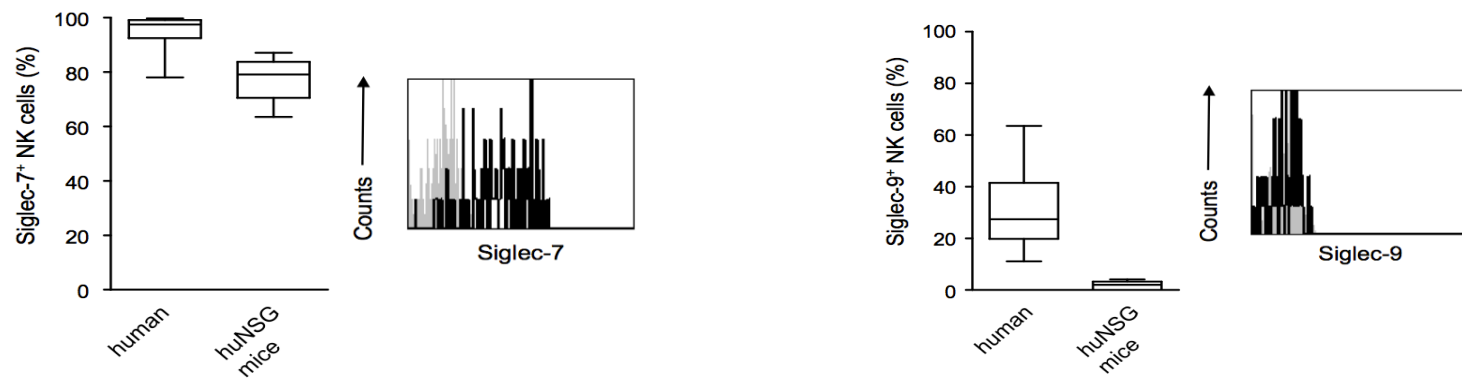

**Supplemental Figure 4.** Circulating NK cells of (hu)-NSG mice express high levels of Siglec-7. Flow cytometry of NK cells from peripheral blood of hu-NSG mice (n=13) for expression of human Siglec-7 and Siglec-9. Frequency (left of each pair) and representative histograms (right of each pair) are shown. Specific staining (black line), and isotype-matched control (shaded).



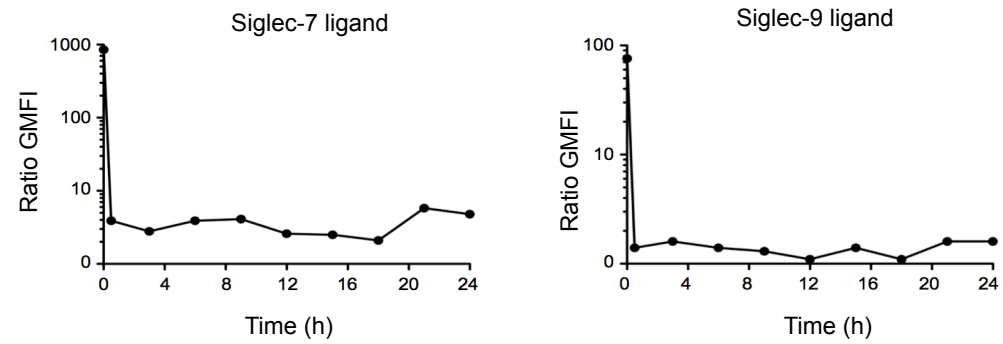

**Supplemental Figure 5.** Siglec-7 and Siglec-9 ligands on K562 cells are not reexpressed within 24 hours following neuraminidase treatment. Expression of Siglec-7 and Siglec-9 ligands on K562 cells before (t=0) or after neuraminidase-treatment, as assessed by flow cytometry over a period of 24 hours. Values are expressed as GMFI ratio compared to control.

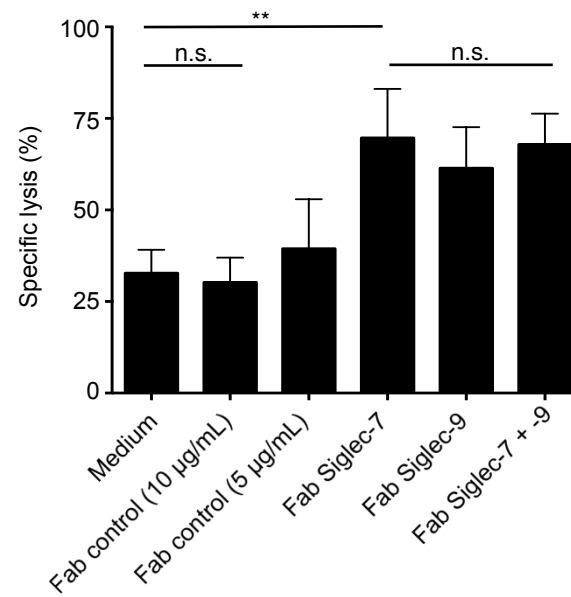

**Supplemental Figure 6.** The combination of Siglec-7 and -9 Fab fragments has no enhanced effect on NK cell cytotoxicity against K562 target cells, as assessed by a  $^{51}\text{Cr}$  assay at an E/T ratio of 10/1 (n=7). \*\*P<0.005 (Student's *t*-test).

**A**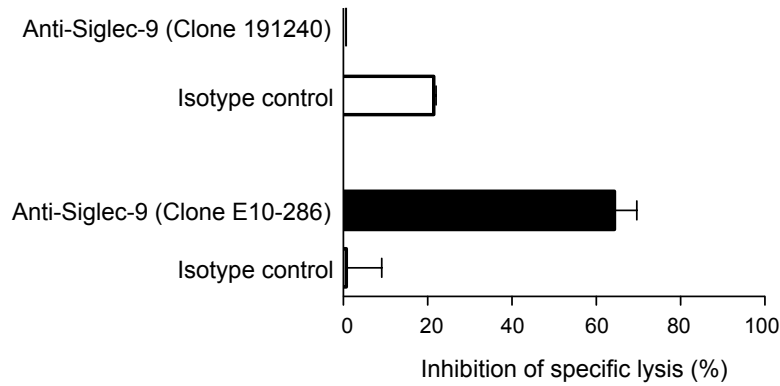**B**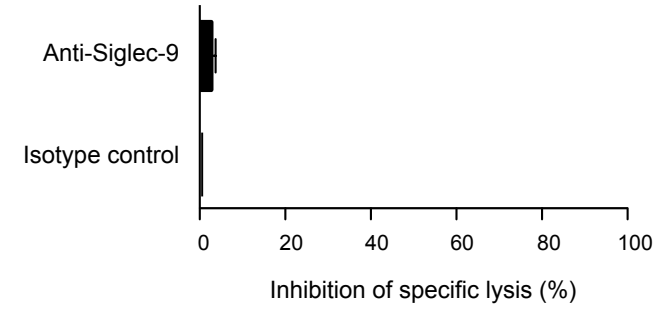**C**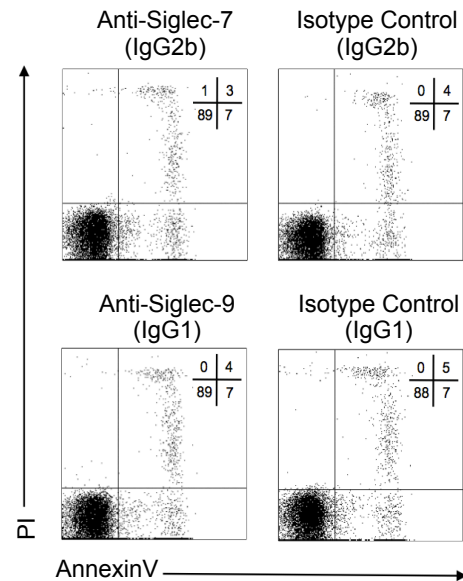**D**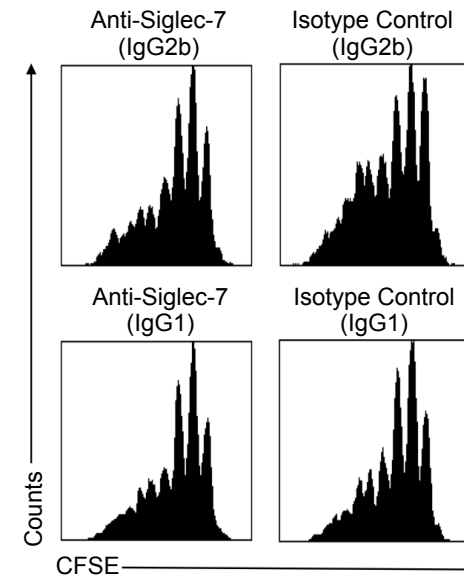

**Supplemental Figure 7.** Effects of targeting Siglec-7 and -9 on NK cell cytotoxicity, survival and proliferation. (A,B) Cytotoxicity of isolated peripheral blood NK cells from healthy donors against the K562 cell line assessed in a  $^{51}\text{Cr}$ -release assay in the presence of indicated mAbs (n=2 for Clone 191240, n=10 for Clone E10-286). E/T ratio 20/1. (B) Cytotoxicity of sorted human  $\text{CD}56^{\text{dim}} \text{CD}16^+$  Siglec-9<sup>+</sup> NK cells against the K562 cell line assessed in a  $^{51}\text{Cr}$ -release assay in the presence of E10-286 mAb or an isotype control (n=3). (C,D) Flow cytometric analysis of NK cell survival (C) and proliferation (D). (C) AnnexinV-GFP/PI staining of 24-hour cultures in the presence of indicated mAbs at 10  $\mu\text{g}/\text{ml}$ . Similar results were achieved at lower mAb concentrations. (D) CFSE dilution upon stimulation with IL-2 and IL-15 for 9 days and culture in the presence of anti-Siglec-7 mAb at 4  $\mu\text{g}/\text{ml}$ , anti-Siglec-9 mAb at 3  $\mu\text{g}/\text{ml}$ , or isotype-matched control mAbs. Data are representative of four (C) or three (D) independent experiments.

**A**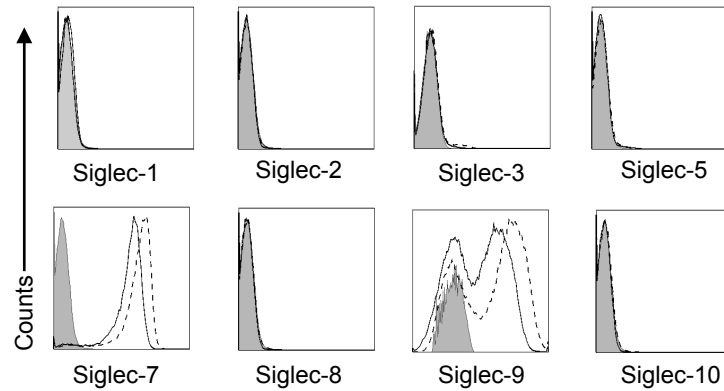**B**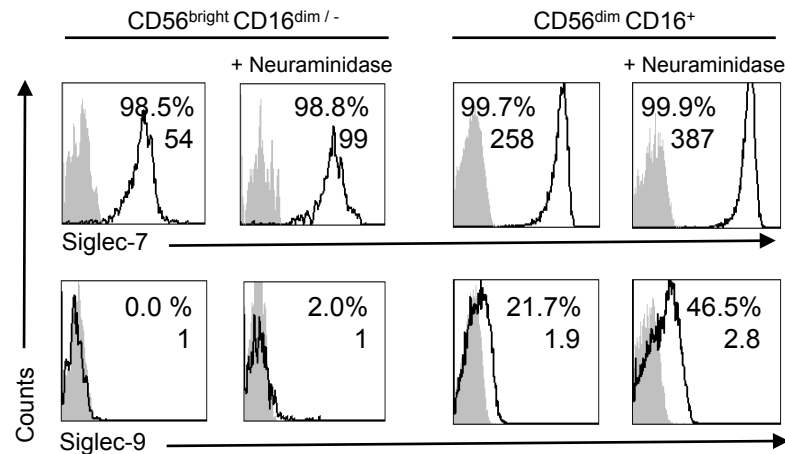**C**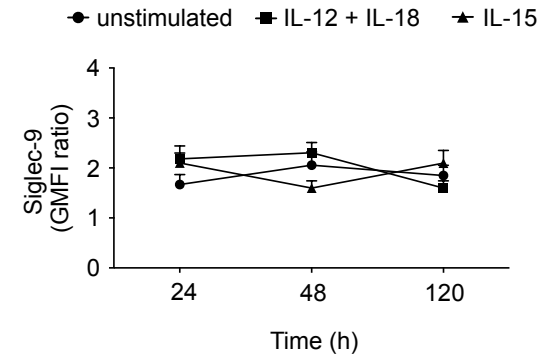**D**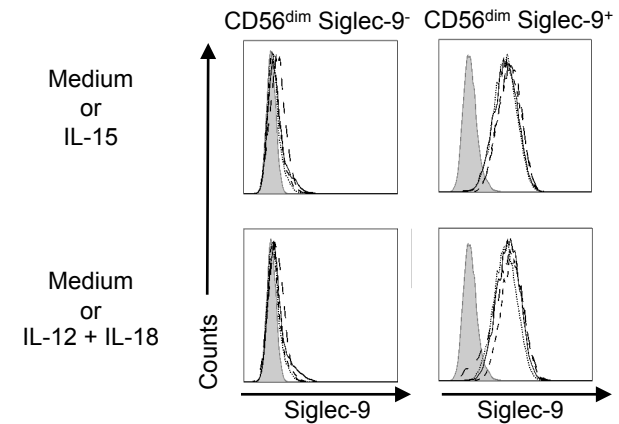

**Supplemental Figure 8.** Expression of siglecs on human NK cells. (A) Flow cytometry of surface siglec receptor expression on peripheral blood NK cells of adult healthy donors with and without neuraminidase treatment. Specific staining (black line), neuraminidase treated cells (dashed line) and isotype-matched control (shaded) (n=3). (B) Representative examples of Siglec-7 and Siglec-9 expression on CD56<sup>bright</sup> CD16<sup>dim/-</sup> and CD56<sup>dim</sup> CD16<sup>+</sup> NK cell subsets with or without unmasking by neuraminidase treatment (removal of sialic acid residues). (C,D) Siglec-9 expression on NK cells in presence of NK cell-relevant cytokines as assessed by flow cytometry. (C) Geometric mean fluorescence intensity (GMFI) ratios of gated Siglec-9<sup>+</sup> NK cells from total NK cell cultures. (D) Histograms are representative of freshly fluorescence-activated cell sorted NK cell Siglec-9<sup>+</sup> or Siglec-9<sup>-</sup> CD56<sup>dim</sup> NK cell subsets (dotted line), isotype control (shaded), 24 (dashed line), 48 (solid line) or 120 (long dashed line) hour-cultures. Data are representative of at least three (A,D), six (C), or 14 (B), experiments.

**A**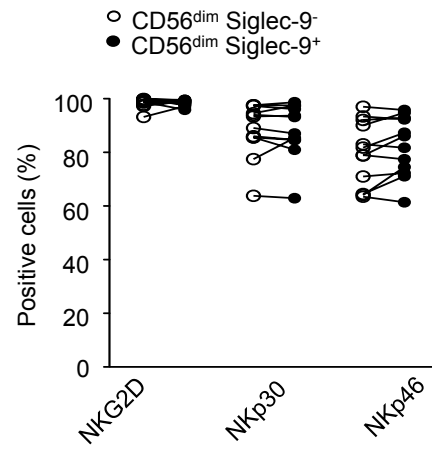**B**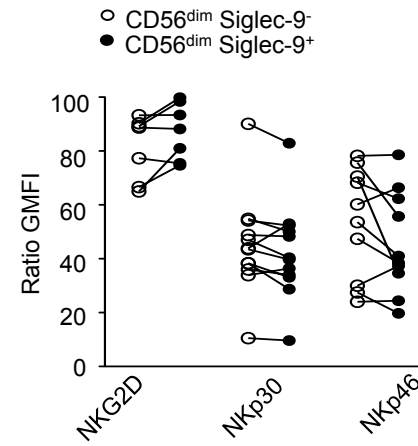

**Supplemental Figure 9. (A,B)** Flow cytometry of Siglec-9<sup>-</sup> (open circles) and Siglec-9<sup>+</sup> (filled circles) gated CD56<sup>dim</sup> CD16<sup>+</sup> NK cells from healthy donors (n=10-19) for surface expression of NKG2D and NCRs.

**A**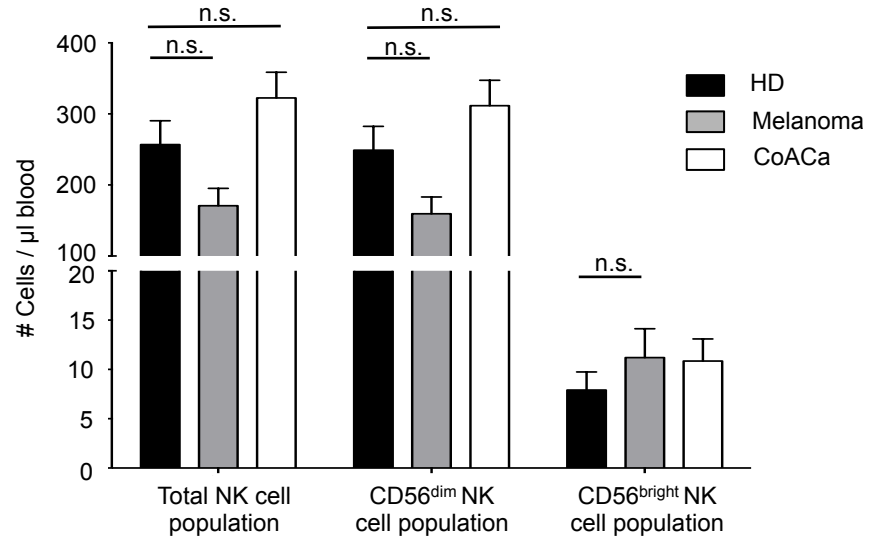**B**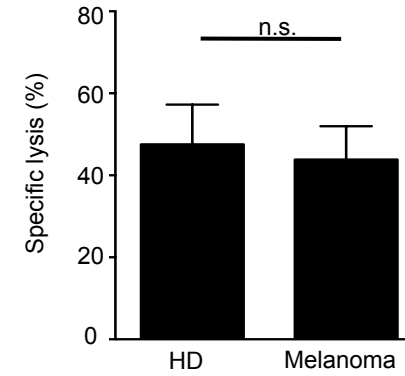**C**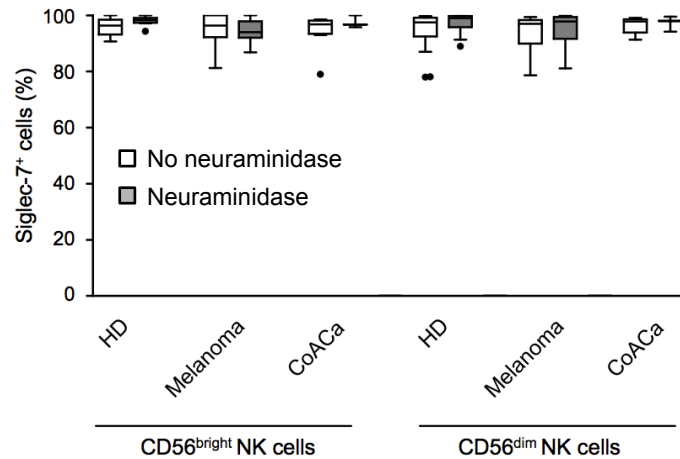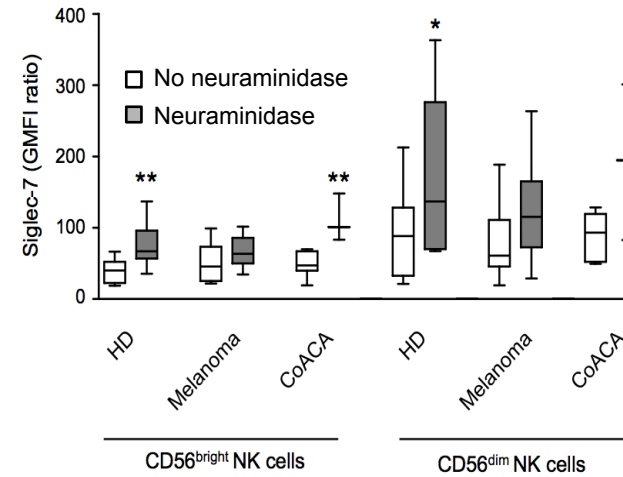

**Supplemental Figure 10.** Frequency and Siglec-7 expression on peripheral blood NK cells in cancer. **(A)** NK cell numbers in the peripheral blood of melanoma and colon adenocarcinoma (CoACa) patients. **(B)** Cytotoxicity of NK cells from healthy donors (HD) and melanoma patients, as assessed in a <sup>51</sup>Cr release assay of K562 target cells at an E/T ratio of 20/1 (n=7). **(C)** Expression of Siglec-7 on peripheral blood NK cells of healthy donors (HDs) and cancer patients. Shown are frequency and GMFI ratio of specific staining to isotype-matched control, without (white bars) or with (grey bars) neuraminidase treatment. \*P<0.05, and \*\*P<0.005 (Student's t-test).
